# Supplementary material for: Meropenem Disposition in Neonatal and Pediatric Extracorporeal Membrane Oxygenation and Continuous Renal Replacement Therapy
Source: MDPI journal article supplement (doi:10.3390/antibiotics13050419), 2024-05-03
Supplement: s1 [file s1]

**Figure S1.** Normalized prediction distribution errors (NPDE) of the final model. Visual output of the NPDE analysis. Shown at the top are the QQ plot and histogram of the NPDEs in the overall dataset. The red dotted line and blue shaded areas show the expected trends and 95% confidence intervals of these trends, while the dark blue lines and bars show the observed NPDE distributions. At the bottom, the individual NPDE values for each observation are plotted versus time and versus the predicted concentrations with the symbols. The solid lines in the bottom graphs indicate the mean (red) and the 95% percentiles (blue) of the NPDEs, and the shaded areas are the simulated 95% confidence intervals of the NPDE median (red) and 95% percentiles (blue), while the dotted red and blue lines show the expected values for the median and 95% percentiles.

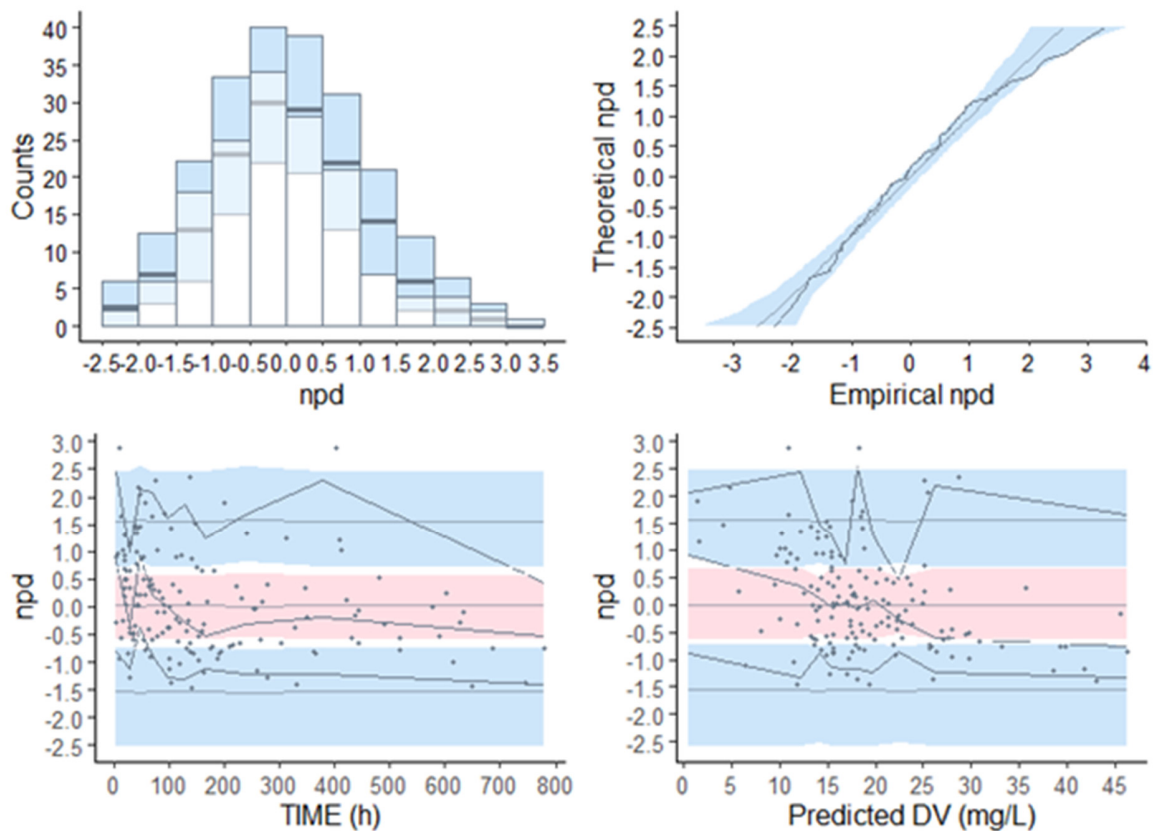

**Table S1.** Meropenem concentrations distribution on extracorporeal membrane oxygenation (ECMO) and continuous renal replacement therapy (CRRT)

| Modality           | Number of concentrations (%) |
|--------------------|------------------------------|
| ECMO on            | 94 (62%)                     |
| CRRT on            | 91 (60%)                     |
| ECMO on, CRRT on   | 66 (43%)                     |
| ECMO off, CRRT on  | 25 (16%)                     |
| ECMO on, CRRT off  | 28 (18%)                     |
| ECMO off, CRRT off | 33 (22%)                     |
| Pre-ECMO           | 0                            |
| Post-ECMO          | 37 (24%)                     |

**Table S2. PTA for 40%fT>MIC**

[illegible]

**Table S3.** PTA for 100%fT>MIC

| BW=3.6<br>2 kg  | 20 mg/kg 30 min<br>q8h |            | 20 mg/kg 3 h q8h |            | 40 mg/kg 30 min<br>q8h |            | 40 mg/kg 3 h q8h |            | 60 mg/kg cont. |            | 120 mg/kg cont. |            |
|-----------------|------------------------|------------|------------------|------------|------------------------|------------|------------------|------------|----------------|------------|-----------------|------------|
| MIC             | CRRT=<br>0             | CRRT=<br>1 | CRRT=<br>0       | CRRT=<br>1 | CRRT=<br>0             | CRRT=<br>1 | CRRT=<br>0       | CRRT=<br>1 | CRRT=<br>0     | CRRT=<br>1 | CRRT=<br>0      | CRRT=<br>1 |
| 0.5             | 75                     | 81         | 73               | 81         | 70                     | 84         | 77               | 86         | 85             | 89         | 94              | 98         |
| 1               | 67                     | 74         | 72               | 78         | 74                     | 81         | 82               | 89         | 51             | 78         | 79              | 88         |
| 2               | 47                     | 62         | 49               | 48         | 65                     | 84         | 72               | 78         | 22             | 49         | 51              | 78         |
| 4               | 8                      | 8          | 8                | 10         | 46                     | 61         | 48               | 50         | 4              | 18         | 22              | 45         |
| 8               | 0                      | 0          | 0                | 0          | 7                      | 7          | 7                | 10         | 1              | 0          | 5               | 17         |
| 16              | 0                      | 0          | 0                | 0          | 0                      | 0          | 0                | 0          | 0              | 0          | 0               | 0          |
| BW=11.<br>97 kg | 20 mg/kg 30 min<br>q8h |            | 20 mg/kg 3 h q8h |            | 40 mg/kg 30 min<br>q8h |            | 40 mg/kg 3 h q8h |            | 60 mg/kg cont. |            | 120 mg/kg cont. |            |
|                 | CRRT=<br>0             | CRRT=<br>1 | CRRT=<br>0       | CRRT=<br>1 | CRRT=<br>0             | CRRT=<br>1 | CRRT=<br>0       | CRRT=<br>1 | CRRT=<br>0     | CRRT=<br>1 | CRRT=<br>0      | CRRT=<br>1 |
| 0.5             | 71                     | 84         | 77               | 86         | 74                     | 85         | 80               | 87         | 85             | 88         | 89              | 90         |
| 1               | 66                     | 81         | 73               | 82         | 81                     | 84         | 83               | 86         | 80             | 83         | 85              | 88         |
| 2               | 58                     | 66         | 64               | 71         | 75                     | 76         | 77               | 80         | 73             | 79         | 74              | 81         |
| 4               | 41                     | 57         | 43               | 48         | 65                     | 67         | 60               | 74         | 25             | 63         | 54              | 68         |

[illegible]
